1 **Adoptive transfer of CTLA4-Ig-modulated dendritic cells improves TNBS-induced**  
2 **colitis**

3 **Lisiery Negrini Paiatto<sup>1</sup>, Fernanda Guimarães Drummond Silva<sup>2</sup>, Áureo Tatsumi**  
4 **Yamada<sup>3</sup>, Wirla Maria Silva Cunha Tamashiro<sup>4</sup>; Patricia Ucelli Simioni<sup>1, 4, 5, 6 \*</sup>**

5

6 <sup>1</sup>Department of Biomedical Science, Faculty of Americana, FAM, 13477-360,  
7 Americana, SP, Brazil

8 <sup>2</sup>Department of Food, School of Nutrition, Federal University of Ouro Preto, 35400-  
9 000, Ouro Preto, MG, Brazil.

10 <sup>3</sup>Department of Biochemistry and Tissue Biology, Institute of Biology, University of  
11 Campinas (UNICAMP), 13083-862, Campinas, SP, Brazil.

12 <sup>4</sup>Department of Genetics, Evolution, Microbiology and Immunology, Institute of  
13 Biology, UNICAMP, 13083-862, Campinas, SP, Brazil.

14 <sup>5</sup>Postgraduate Program in Biological Science (Cellular and Molecular Biology),  
15 Department of Biochemistry and Microbiology, Institute of Biosciences, Univ Estadual  
16 Paulista, UNESP, 13506-900 Rio Claro, SP, Brazil

17 <sup>6</sup>Department of Biomedical Science, Faculty of Americana, FAM, 13477-360,  
18 Americana, SP, Brazil.

19

20 Correspondence should be addressed to Patricia Ucelli Simioni [psimioni@gmail.com](mailto:psimioni@gmail.com)

21

22 **E-mail Address:**

23 Lisiery Negrini Paiatto: [lisy\\_paiatto@hotmail.com](mailto:lisy_paiatto@hotmail.com)

24 Fernanda Guimaraes Drummond Silva: fer.dru@gmail.com

25 Aureo Tatsumi Yamada: yamadat3g@gmail.com

26 Wirla Maria da Silva Cunha Tamashiro: wirlatam@unicamp.br

27 Patricia Ucelli Simioni: psimioni@gmail.com

28

29 Full postal address: Rua Joaquim Boer, 733, Department of Biomedical Science,

30 Faculty of Americana, FAM, 13477-360, Americana, SP, Brazil.

31

32 **Running title: CTLA4-Ig-modulated dendritic cell ameliorates experimental colitis**

33

34 **Abstract**

35 Dendritic cells (DCs) play a crucial role in balancing immune responses, and in that

36 sense the interactions between the B7-1 and B7-2 molecules expressed on DCs and

37 CD28 and CTLA-4 on helper T cells are fundamental. While coupling of B7 and CD28

38 molecules activates immune responses, binding of B7 to CTLA4 results in its blockade.

39 CTLA4-Ig fusion protein, a competitor molecule of the B7-CD28 interaction, has been

40 used for the development of immunological tolerance both experimentally and in

41 patients. Here, we evaluated the effects of adoptive transfer of bone marrow-derived

42 dendritic cells (BMDCs) pulsed with CTLA4-Ig in TNBS-induced colitis. CTLA4-Ig-

43 modulated BMDCs or naïve BMDC were administered intravenously to BALB/c mice

44 prior to TNBS rectal instillation. Five days later, spleens and colon segments were

45 removed for immunological and histological analysis. Our results showed that the

46 adoptive transfer of CTLA4-Ig-modulated BMDCs was able to reduce the severity of  
47 inflammation caused by the administration of TNBS, in view of tissue integrity and  
48 reduced leukocyte infiltration in the colon segments of the treated mice compared to  
49 controls. Non-specific spleen cell activation in vitro showed a reduction in the  
50 frequency of CD4<sup>+</sup> IL-17<sup>+</sup> T cells and CD4<sup>+</sup> IFN- $\gamma$ <sup>+</sup> T cells as well as IL-9 secretion in  
51 cultures. To our knowledge, this is the first description of the beneficial effects of  
52 treatment with CTLA4-Ig modulated BMDC in experimental colitis.

53 **Keywords: colitis, dendritic cell, immune modulation, CTLA4-Ig, tolerance,**  
54 **inflammation, inflammatory bowel disease.**

## 56 **1. Introduction**

57 Two distinct signals are required for the activation of the adaptive immune response.  
58 The first signal is established by the binding of antigen-specific receptors on the surface  
59 of T lymphocytes (TCR) and antigenic fragments associated with MHC molecules on  
60 the surface of antigen-presenting cells (APCs). The second signal comes from the  
61 engagement between co-stimulatory molecules, among which the CD28 expressed on  
62 the surface of T lymphocytes and B7-1 (CD80) and B7-2 (CD86) on the surface of  
63 APCs are prominent. The low affinity interaction between CD80/CD86 and CD28 is  
64 essential to promote the activation, proliferation and survival of lymphocytes. The  
65 production of specific antibodies by B lymphocytes and the increase of phagocytic cell  
66 activities are the most evident results of this initial activation (1–4).

67 As the immune response proceeds and the antigen triggering this response is eliminated,  
68 a cell surface glycoprotein called CTLA4 (CD152) begins to be expressed at low levels  
69 in activated T cells. CTLA-4 binds with high affinity to the costimulatory molecules  
70 CD80 and CD86 in dendritic cells (DCs), thus initiating the reduction of the specific  
71 immune response(5–9).

72 Altered responses against self-antigens are at the origin of autoimmune diseases.  
73 Inflammatory bowel disease (IBD) is a group of immune-mediated diseases  
74 characterized by severe inflammation of the digestive tract (10). The etiology of IBD is  
75 still unknown, but the most plausible hypothesis is that it is due to the combination of  
76 genetic and environmental factors, particularly disturbances of the microbiota, leading  
77 to an aberrant inflammatory response of the host (11–13). Several immunomodulatory

78 drugs such as azathioprine and mycophenolate (inhibitors of T-cell proliferation),  
79 monoclonal antibodies, such as OKT3 (depletes and blocks T cells), and cyclosporine,  
80 tacrolimus and glucocorticoids (blockage of cytokine production) have been applied  
81 with relative success in the control of autoimmune diseases. However, most of them can  
82 lead to complications related to the onset of opportunistic infections as well as  
83 nephrotoxicity. Due to the serious side effects of nonspecific anti-inflammatory drugs  
84 and broad-spectrum immunosuppressive drugs routinely employed in the treatment of  
85 autoimmune diseases, current studies are looking at ways to manipulate immune system  
86 to reduce the need for these substances (10). Thus, new therapeutic approaches aimed at  
87 inhibiting immune responses in a more natural way have been developed in the last two  
88 decades. Among these new approaches, one of the best studied involves the use of  
89 CTLA4-Ig, a competitor molecule of the B7/CD28 interaction. In principle, its use  
90 would allow the development of immune tolerance to autoantigens by naturally  
91 blocking the activation of specific T lymphocytes (14–19).

92 To test these approaches prior to being screened in humans, several experimental  
93 models are available. In relation to IBD, experimental models of colitis induced by  
94 chemical or biological agents that mimic the main characteristics of human disease are  
95 currently used (20–22). Colitis induced by instillation of 2,4,6-trinitrobenzenesulfonic  
96 acid (TNBS) in BALB/c mice, for example, generates a relatively mild inflammation of  
97 the intestinal mucosa and slight weight loss, with reestablishment of the animal within a  
98 few days after instillation. Such characteristics make this one of the experimental  
99 models most used in the study of colitis modulators(23,24).

100 It is well known that DCs can interfere in the balance between immunity and tolerance.  
101 However, few clinical applications have been successful so far (25–27). On the other  
102 hand, some experimental studies have shown that CTLA4-Ig, a soluble chimeric fusion  
103 protein (CD152/Fc), can block the B7/CD28 signaling pathway by competition with  
104 CD80 and CD86 molecules expressed in DCs, thereby reducing responses autoimmune  
105 and graft rejection (16,28).

106 In this work, we evaluated the effects of the adoptive transfer of CTLA4-Ig-modulated  
107 bone marrow-derived dendritic cells (BMDC<sub>CTLA4-Ig</sub>) on the inflammatory response  
108 observed in TNBS-induced colitis in BALB/c mice. BMDC<sub>CTLA4-Ig</sub> and control BMDCs  
109 (BMDC<sub>naïve</sub>) were administered intravenously for three consecutive days prior to  
110 instillation of TNBS. Five days later, the spleen and colon segments were removed for  
111 immunological and histological analysis.

## 112 **2. Material and methods**

### 113 **2.1. Animals**

114 BALB/c female mice (20–25g) at four weeks of age were obtained from the  
115 Multidisciplinary Center for Biological Research (CEMIB) of the University of  
116 Campinas (UNICAMP), Campinas, SP, Brazil. They were maintained in specific  
117 pathogen-free environment at 25° C ±1 and photoperiod of 12/12 hours. Mice were fed  
118 with autoclaved Nuvilab CR-diet (Colombo, PR, Brazil) and water *ad libitum* for 2-4  
119 weeks before being used in experiments. Mouse manipulation were carried out in  
120 accordance with the ‘Guide for the Care and Use of Laboratory Animals’, as promoted  
121 by the Brazilian College of Animal Experimentation (COBEA) and approved by the

122 Ethics Committee for Animal Experimentation of University of Campinas  
123 (CEUA/UNICAMP Protocol #3077-1). All experimental procedures were performed  
124 under anesthesia (ketamine and xylazine) and all efforts were made to minimize animal  
125 suffering . Each experimental group consisted of at least five animals. Assays were  
126 repeated at least two times. Mice were monitored daily for signs of colitis such as rectal  
127 swelling, rectal bleeding, soft stools as well as weight loss.

## 128 **2.2. Bone marrow dendritic cells**

129 Bone marrow dendritic cells (BMDCs) were generated from bone marrow precursors as  
130 described elsewhere. Briefly, bone marrow cells were flushed from femurs and tibias of  
131 naïve BALB/c mice with RPMI 1640 medium (Sigma) containing 10% fetal bovine  
132 serum (FBS, Cultilab, Brazil), 20 µg/mL gentamicin solution (Sigma). Bone marrow  
133 cells were seeded in six-well plates (Corning, USA) at a density of  $2 \times 10^6$  white  
134 cells/well in RPMI-10% FBS containing 20ng/mL mouse recombinant granulocyte  
135 macrophage colony-stimulating factor (mGM-CSF) (Biosource, USA) and then  
136 incubated at 37° C in 5% CO<sub>2</sub>. On days 3 and 6, the culture medium was replaced with  
137 fresh medium containing GM-CSF(29). On the eighth day of culture, the differentiated  
138 cells were collected, pelleted by centrifugation at 200 g, for 10 min, resuspended in  
139 RPMI-10% FBS containing 40ng/mL CTLA4-Ig (CD152/Fc chimera, non-cytolytic,  
140 from mouse, Sigma C4358), plated in 24-well culture plates at a density of  $2 \times 10^6$   
141 cells/well and cultured for an additional 24 hours (BMDC<sub>CTLA4-Ig</sub>). Cells cultured in the  
142 absence of CTLA4-Ig were used as control (BMDC<sub>naïve</sub>).

## 143 **2.3. Phenotypic profile of BMDC**

144 The phenotypic characteristics of the BMDCs were evaluated by flow cytometry as  
145 previously described by our group (30) and others (31–33)(33). For this, the cells were  
146 labeled with anti-mouse CD11c-APC (Clone: HL3), anti-mouse MHC-II-PE (130-091-  
147 368, Miltenyi Biotec), anti-mouseCD80-FITC (Clone: 16-10A1), anti-mouseCD86-  
148 FITC (Clone: GL1) and anti-mouse CD40-FITC (Clone: 3/23) according to the  
149 manufacturer's instructions (BD Bioscience, USA). All controls were performed using  
150 irrelevant isotype staining. The readings were performed using the FACSCalibur  
151 (Becton-Dickinson, Franklin Lakes, NJ, USA) flow cytometer, using FCS Express 5  
152 Plus, Research Edition software.

#### 153 **2.4. Adoptive transfer of BMDC and colitis induction**

154 Three doses of  $1 \times 10^6$  BMDC<sub>CTLA4-Ig</sub> or BMDC<sub>naïve</sub> were injected intravenously into  
155 naïve syngeneic mice on days 5, 3 and 1 before the colitis induction (Fig 1). Colitis was  
156 induced by intrarectal administration of a single dose of 2,4,6-trinitrobenzenesulphonic  
157 acid (TNBS), as described elsewhere, with modifications. Briefly, mice were  
158 anesthetized with and instilled with 100 $\mu$ L of 1.0mg/mL TNBS (2,4,6-  
159 trinitrobenzenesulfonic acid; Sigma, USA) dissolved in 50% ethanol into the lumen of  
160 the colon. To ensure that TNBS enter entire colon, mice were held in a vertical position  
161 for 30s. Two control groups of mice that did not receive DC were used: 1) animals  
162 inoculated intrarectally with 100 $\mu$ L 50% ethanol in saline; 2) animals inoculated  
163 intrarectally with 100 $\mu$ L of 1.0mg/mL TNBS dissolved in 50% ethanol.

164 [Insert Fig 1]



## 165 **2.5. Evaluation of clinical symptoms of TNBS-induced colitis**

166 Animals of all groups were weighed daily until sacrifice on the fifth day following the  
167 instillation of TNBS. Weight variation was calculated as percentage, considering the  
168 weight at day zero as 100%. Clinical symptoms such as diarrhea, rectal prolapse,  
169 bleeding and cachexia were registered and assigned as scores, ranging from 0 to 2, with  
170 0: no change, 1: slight change (liquid feces, inflammation in the anus, mucus liberation  
171 and weakness), and 2: severe change (diarrhea, rectal prolapse, bleeding, and cachexia)  
172 and these values were mean to each animal. Data are presented as the mean  $\pm$  Standard  
173 Error of the Mean (S.E.M.)

## 174 **2.6. Histological analysis of the colon**

175 The mice were euthanized five days after induction of colitis. Two portions of the colon  
176 distant 1-2 cm (P1 = proximal1) and 2-3 cm (P2 = proximal 2), respectively, of the anal  
177 sphincter were removed, fixed in 4% buffered formalin, dehydrated with ethanol  
178 solutions, and embedded in paraffin (Paraplast Plus Sigma P3683). Slices of 5 $\mu$ m were  
179 cut into a microtome (Leica - model Jung Biocut 2035) and mounted on clean glass  
180 slides. The specimens were then dewaxed, rehydrated and stained with hematoxylin and  
181 eosin (Merck). As the distal portions of the intestine are unaffected by treatment with  
182 TNBS, sections of these segments were not examined.

183 The P1 and P2 segments of the colon were evaluated by microscopy for the presence of  
184 folds, hemorrhage, gauge and leukocyte infiltrate. The data were represented by scores  
185 corresponding to the sum of the values attributed to the presence and characteristics of  
186 the folds in the mucosa (0 for normal folds, 1 for slightly altered folds, 2 for deformed

187 folds, 3 for very deformed folds, 4 for dorsal folds reduction , 5 for lack of folds);  
188 bleeding (0 for no bleeding, 1 for bleeding present, 2 for large bleeding); mucosal  
189 dilatation (0 for absence of voids, 1 for apparent voids, 2 for large voids); and  
190 lymphocytic infiltrate in the mucosa, submucosa and mesentery (0-none; diffuse  
191 inflammatory infiltrate-1; 2-considerable inflammatory infiltrate with submucosal  
192 disorganization; 3-intense infiltrate) as previously described 5. Thickening of the colon  
193 wall was measured in micrometers using the Infinity Analyze Nikon H600L (100X). The  
194 final scores represent the mean  $\pm$  S.E.M (23,34).

195 Histomorphometric analysis was performed on sections of P1 and P2 segments prepared  
196 for immunoperoxidase reactions using the following antibodies: anti-CD3 (T  
197 lymphocytes) and anti-F4/80 (macrophages) and anti-Ly-6c NIM (neutrophils) (35,36).  
198 Peroxidase-conjugated secondary antibodies (Sigma) and diaminobenzidine (DAB;  
199 Sigma) were used in the development of reactions (37,38). After counter-staining with  
200 hematoxylin/eosin, the tissues were observed under light microscopy for counting the  
201 labeled cells. Evaluations were done in a double-blind fashion and the quantification of  
202 labeled cells was performed in five random fields in each specimen. Sections P1 and P2  
203 of at least three animals in each group were evaluated, making a total of 15  
204 measurements per group, in each experiment. Results were expressed as mean  $\pm$  S.E.M.  
205 Three independent experiments were performed (24,39,40).

## 206 **2.7. Spleen cell proliferation**

207 Spleens were collected aseptically from mice of all experimental groups, macerated  
208 individually, suspended in lyses buffer and pelleted by centrifugation at 200 g for 10

209 min. Cell concentrations were adjusted to  $1 \times 10^6$  cells/mL in RPMI medium (Sigma,  
210 USA) supplemented with 10% fetal bovine serum (Cultilab, Campinas, Brazil). After  
211 washing, spleen cell suspensions were incubated with  $25 \mu\text{M}$   
212 carboxyfluoresceinsuccinimidyl probe ester (CFSE) in RPMI-10% FBS at room  
213 temperature for 5 min, according manufacturer's recommendations (Invitrogen, USA).  
214 Cells were then pelleted by centrifugation and suspended in fresh medium. To  
215 determine the maximum uptake of CFSE, aliquots of each cell suspension were fixed  
216 with 1% formaldehyde in PBS and analyzed by flow cytometer. Then  $100 \mu\text{L}$  aliquots of  
217 each suspension of CFSE-labeled cells were seeded in duplicate in 96-well plates  
218 (Corning) and incubated in the presence of  $2.5 \mu\text{g} / \text{ml}$  ConA for 72 hours at  $37^\circ \text{C}$ .  
219 Cultures of cells conducted in the absence of Con-A were used as controls.

220 The proliferation of T lymphocytes in the cultures was assessed at the gate of  
221  $\text{CD4}^+\text{CFSE}^+$  cells. Acquisitions were performed with FACSCalibur flow cytometer  
222 (FACSCalibur flow cytometer, BD Becton Dickinson, San Jose, CA)(34,41). The  
223 results were analyzed with the FCS Express Plus Research Edition software (FCS  
224 Express Launcher). Results were expressed as proliferation index (fold change)  
225 calculated in relation to that of the control group (24,34).

226 In parallel, cultures of CFSE-unlabeled spleen cells from mice of all experimental  
227 groups were conducted to measure the levels of cytokines released in the supernatants  
228 after Con-A stimulation as described below.

## 229 **2.8. Phenotypic profile of T-cells**

230 The frequencies of  $\text{TCD4}^+\text{CD25}^+ \text{Foxp3}^+$  (Treg cells),  $\text{TCD4}^+\text{IL17}^+$ ,  $\text{TCD4}^+\text{IFN}\gamma^+$  and

231 TCD4<sup>+</sup>IL-10<sup>+</sup> cells in the spleen cell cultures were assessed by flow cytometer. Briefly,  
232 cell suspensions were washed and initially stained with anti-CD3 APC (clone 145-  
233 2C11, BD #553066), anti-CD4-PE (Clone GK1.5) and anti-CD25-FITC (Clone 7D4).  
234 Then, cells were permeabilized by the addition of fixation/permeabilization buffer  
235 (Cytofix/Cytoperm fixation/permeabilization kit, Becton-Dickinson, BD). Suspension  
236 was stained with anti-Foxp3-APC (clone FJK-16S), anti-IL-17-APC (clone eBIO17B7)  
237 or Alexa Fluor 647 (Clone TC11-18410), anti-IFN- $\gamma$ -APC (Clone XMG1.2) and IL-10-  
238 APC (Clone JESS-16E3), 647 (Clone Q21-378), according to manufacturer's  
239 instructions. Controls were performed with irrelevant isotype staining. Acquisitions  
240 were performed with FACScalibur flow cytometer and analyzes were done with the  
241 FCS Express 5 Plus, Research Edition software (23,34)

## 242 **2.9. Determination of Th1, Th2, Th17 and Th9 cytokines**

243 IL-2, IL-4, IL-6, IL-10, IL-17A, IFN- $\gamma$  and TNF- $\alpha$  were quantified in culture  
244 supernatants of spleen cells by flow cytometer, using Multiplex CBA kit (BD  
245 Cytometric Bead Array Th1/Th2/Th17, San Diego, USA) according to manufacturer's  
246 instructions. Fluorescence were acquired in FACScalibur cytometer and analyzed with  
247 FCAP Array TM Software Version 3.0 (BD). IL-9 determination was assayed with  
248 CBA flex set (BD Cytometric Flex Set Th9, San Diego, USA) (23,34)

## 249 **2.11. Statistical analysis**

250 The statistical analysis was performed using GraphPad Prism 5 (GraphPad Software,  
251 San Diego, CA, USA). The statistical significance of differences between control and  
252 experimental groups were determined by one-way ANOVA, followed by Bonferroni's

253 test for multiple comparisons or unpaired Student's t-test. The results were expressed as  
254 mean  $\pm$  Standard Error of the Mean (S.E.M). Values were considered significant at  $P <$   
255 0.05. All data presented are representative of at least three independent experiments.

### 256 **3. Results**

#### 257 **The effects of adoptive transfer of BMDCs on TNBS-induced colitis**

258 Dendritic cells were differentiated in vitro from precursors collected from the bone  
259 marrow of BALB/c mice by their culture in the presence of recombinant GM-CSF for  
260 eight days. Differentiated bone marrow DCs (BMDCs) were then incubated in the  
261 presence or absence of recombinant CTLA4-Ig for 24 hours before being employed in  
262 adoptive transfer assays. We observed that modulation of BMDCs with CTLA4-Ig did  
263 not modify the expression pattern of the CD11c, MHC class II, CD40, CD80 and CD86  
264 molecules on the surface of these cells compared to CTLA4-Ig untreated BMDCs  
265 (BMDC<sub>naïve</sub>), as can be seen in Supplementary Figure 1 (Supp. Fig 1).

266 Weight loss in TNBS-induced colitis is generally mild (about 10%) and recovery of  
267 body weight is usually observed as early as the fourth day after drug administration in  
268 BALB/c mice. As can be seen in Figure 2A, the adoptive transfers of BMDC<sub>CTLA4-Ig</sub> or  
269 BMDC<sub>naïve</sub> did not result in any significant improvement in weight loss observed in the  
270 first days after TNBS instillation and, as expected, by the fourth day all mice had  
271 already recovered. However, the other clinical signs of the disease (diarrhea, rectal  
272 prolapse, soft stools, and hemorrhagic stools) were significantly reduced by previous  
273 treatment with BMDC<sub>CTLA4-Ig</sub>, as shown in Figure 2B.

274 [Insert Fig 2]

275 As can be seen in Figure 3A, administration of TNBS induced a strong inflammatory  
276 reaction that affected the regions closest to the rectum (both P1 and P2 segments), with  
277 a large number of infiltrated leukocytes. However, previous treatment with  
278 BMDC<sub>CTLA4-Ig</sub> significantly reduced leukocyte infiltration caused by instillation of  
279 TNBS.

280 The cells present in the infiltrate consisted mainly of macrophages (Figure 3B), while  
281 neutrophils were rarely found. It was also observed that the colonic tissue of mice  
282 treated with BMDC<sub>CTLA4-Ig</sub> showed a significant reduction in the number of infiltrated  
283 macrophages when compared to the tissues of mice without previous treatment with  
284 BMDCs. Pretreatment with BMDC<sub>naïve</sub> did not modify the inflammatory process  
285 induced by the instillation of TNBS. On the other hand, the adoptive transfer of  
286 BMDC<sub>CTLA4-Ig</sub>, but not BMDC<sub>naïve</sub>, was able to prevent thickening of the colon wall,  
287 particularly in the P1 region, as shown in Figure 3C.

288 [Insert Figure 3]

### 289 **The effects of adoptive transfer of BMDCs on immune response of colitic mice**

290 The effects of the adoptive transfer of BMDC<sub>CTLA4-Ig</sub> on the immunological functions of  
291 lymphocytes from colitic mice are shown in Figures 4 and 5. The proliferative response  
292 of T lymphocytes was significantly lower in cultures of spleen cells from mice  
293 pretreated with BMDC<sub>CTLA4-Ig</sub> than in controls groups (Figure 4A). The frequencies of  
294 Treg cells (CD25<sup>+</sup> Foxp3<sup>+</sup> T cells) in cultures of spleen cells of mice previously treated

295 with BMDC<sub>CTLA4-Ig</sub> as well as those receiving TNBS alone were significantly higher  
296 than in the other groups, as shown in Figure 4B. The frequency of CD4<sup>+</sup> T cells  
297 producing IFN- $\gamma$  and IL-17 was significantly lower in the cultures of spleen cells from  
298 mice pretreated with BMDC<sub>CTLA4-Ig</sub>, compared to the other groups (Fig 4, C and E). On  
299 the other hand, the frequency of CD4<sup>+</sup> T cells producing IL-10 was higher in the  
300 cultures of spleen cells from mice pretreated with BMDC<sub>CTLA4-Ig</sub> and, interestingly,  
301 lower in the cultures of spleen cells from mice pretreated with BMDC<sub>naïve</sub> compared  
302 with the other groups (Figure 4G). No significant differences were observed between  
303 the experimental groups in relation to the intracellular labeling of RORc and T-bet  
304 transcription factors (Fig 4D, 4F). However, GATA3 factor labeling was higher in  
305 spleen cells from mice treated with BMDC<sub>CTLA4-Ig</sub> (Fig. 4H).

306 As shown in Figure 5C, IL-4 was present at levels detectable only in spleen cell culture  
307 supernatants from mice pretreated with BMDC<sub>CTLA4-Ig</sub>. Significantly elevated IL-10  
308 levels were found in supernatants from splenic cell cultures of mice pretreated with  
309 BMDC<sub>naïve</sub> or BMDC<sub>CTLA4-Ig</sub>, compared to controls (Figure 5E). However, IL-6 levels  
310 were also higher in spleen cultures from BMDC<sub>naïve</sub>-pretreated mice compared to the  
311 other groups (Figure 5B). Higher IL-9 levels were detected in splenic cell culture  
312 supernatants from control mice that received only intrarectal ethanol. In mice treated  
313 with BMDC<sub>CTLA4-Ig</sub> prior to TNBS instillation, however, levels of IL-9 were  
314 significantly lower than in all other groups (Figure 5G). There were no significant  
315 differences in the levels of IL-2, IL-17, TNF- $\alpha$  and IFN- $\gamma$  (Figure 5 A, D, F, H,  
316 respectively).

317 [Insert Figures 4 and 5]

#### 318 4. Discussion

319 Experimental colitis induced by TNBS instillation is characterized by chronic  
320 inflammation of the gastrointestinal tract of mice with features overlapping those seen  
321 in inflammatory bowel diseases in humans. Literature data have shown the importance  
322 of oral tolerance and treatments with tolerogenic dendritic cell for the reduction of  
323 colitis damages. In this sense, previous studies of our group have shown that oral  
324 tolerance to OVA albumin as well as the adoptive transfer of dendritic cells from OVA-  
325 tolerant mice is able to reduce the damage caused by TNBS-induced colitis in syngeneic  
326 animals (23,24). We have also shown that flaxseed protein hydrolysates and phenolic  
327 fractions were able to ameliorate TNBS-induced colitis in BALB/c mice. Treatments  
328 with flaxseed protein fractions reduced inflammation of the intestinal mucosa in TNBS-  
329 induced colitis in BALB/c mice, as well as the proliferation of their splenic cells in  
330 response to Con-A, the frequency of Th1 and Th17 cells, and the levels of inflammatory  
331 cytokines in culture supernatants. In addition, the administration of phenolic compounds  
332 from flaxseeds prevented intestinal inflammation and increased the frequency of Treg  
333 lymphocytes in splenic cell cultures of BALB/c mice with colitis (34). The present work  
334 expanded these findings, demonstrating that the adoptive transfer of bone marrow-  
335 derived dendritic cells modulated with CTLA4-Ig, a recombinant mouse protein which  
336 binds with both B7-1 and B7-2 molecules, can improve clinical signs of the TNBS-  
337 induced colitis in BALB/c mice. It also shows that after transfer of CTLA4-Ig-  
338 modulated BMDCs, spleen T lymphocytes from mice with colitis show a more reduced  
339 proliferative response to Con-A accompanied by a reduction in the frequency of  
340 inflammatory cells secreting IL-17 and IFN-gamma as well as expansion of cells that  
341 produce IL-10 in the cultures. Our data showing an improvement in colitis with



342 CTLA4-Ig-modulated BMDCs corroborates with previous data showing that adoptive  
343 transfer of DCs modulated with dexamethasone and Vitamin D3 (42,43) or IL-10-  
344 modulated DC (44) protects severe combined immune deficient (SCID) mice from  
345 weight loss and pathologies associated with wasting diseases and colitis.

346 CTLA4-Ig is able to selectively modulate T cell activation by binding to CD80/CD86  
347 costimulatory molecules in DCs (9,45). It is already known that direct administration of  
348 CTLA4-Ig affects the functioning of DCs through the IDO pathway, promoting a  
349 regulatory phenotype and consequently inducing the increase in the population of  
350 CD4<sup>+</sup>CD25<sup>+</sup>Foxp3<sup>+</sup> T cells (9,46,47). In the murine model of arthritis, treatment with  
351 CTLA4-Ig was able to reduce the expression of CD80/CD86 molecules on DC and  
352 suppressed the inflammatory response associated with the disease (47). Our results did  
353 not show significant changes in CD80 and CD86 expression after the BMDCs were  
354 treated with CTLA4-Ig. This may be related to the origin of dendritic cells, i.e.  
355 differentiated dendritic cells from bone marrow precursors, and to the doses of CTLA4-  
356 Ig used in this work. Moreover, we used the recombinant protein to modulate the  
357 BMDCs to be transferred adoptively to mice rather than administering it directly to the  
358 animals.

359 It is well known that the instillation of TNBS causes severe changes in the distal portion  
360 of the large intestine, due to the inflammatory process triggered by the immune  
361 response to the drug. Administration of TNBS to rats, for example, results in increased  
362 expression of fibrosis-associated proteins such as phospho-p38, phospho-SMAD2/3,  
363 and PPAR $\gamma$  (48). In agreement with previous studies, we observed that the instillation of  
364 TNBS caused significant histological changes in the large intestine segments of

365 BALB/c mice, particularly in the P2 segment (2 to 3 cm of the anal sphincter). These  
366 changes were characterized by a thickening of the colon and intense inflammatory  
367 infiltrate consisting mainly of macrophages.

368 The literature shows that in the TNBS-induced colitis the adaptive immune response is  
369 predominantly Th1 type, characterized by an increase in IFN $\gamma$ -producing T cells. In  
370 protocols for weekly administration of TNBS for six consecutive weeks, an influx of T  
371 cells was observed around the third day to two weeks after instillation of the drug,  
372 infiltrating the lamina itself and the submucosal layer of the large intestine and  
373 supporting chronic colitis (49). In TNBS single-dose protocols such as that used in this  
374 study, lymphocyte migration to the lamina propria begins about one week after  
375 instillation of the drug (50). Since the animals were euthanized on the fifth day after  
376 TNBS administration, this cell type was virtually absent in our histological preparations.  
377 Likewise, a reduced number of neutrophils were observed in P1 and P2 preparations  
378 since the maximum migration of these cells occurs within the first 48 hours after the  
379 instillation of TNBS. As expected, in the time elapsed between administration of TNBS  
380 and the euthanasia of the animals for histological analysis, macrophages were the most  
381 abundant cells in the inflammatory infiltrate, particularly in the P2 segment of the colon  
382 of animals receiving TNBS alone, in a typical hypersensitivity reaction, as described in  
383 figures 3.

384 Our results show that the adoptive transfer of CTLA4-Ig-modulated BMDC was able to  
385 significantly prevent colon thickening in the P2 portion of the large intestine as well as  
386 the infiltration of macrophages in response to instillation of TNBS. Data from the  
387 literature indicate that the intense leukocyte infiltrate in the intestinal mucosa may be

388 responsible for tissue necrosis and changes associated with colitis symptoms (51).  
389 Lesions in the colon mucosa may be associated with the release of significant amounts  
390 of free radicals, due to the abundance of activated macrophages attracted to the lesion  
391 site (52,53). Thus, our results indicate that DCs modulated in vitro with the recombinant  
392 CTLA4-Ig protein constitute at least one more natural therapeutic alternative for the  
393 treatment of these disorders.

394 In order to evaluate the influence of the adoptive transfer of CTLA4-Ig-modulated  
395 BMDCs on the immune response of TNBS-treated mice, we examined the proliferative  
396 responses, the effector CD4<sup>+</sup> T cell profiles and the release of cytokines in cultures of  
397 spleen cells collected on the fifth day after induction of colitis and stimulated in vitro  
398 with Con-A. Data presented here (Fig 4) show that spleen cells from animals of all  
399 groups proliferated in response to Con-A, but such ability was significantly lower in  
400 splenic cells from mice pretreated with CTLA4-Ig-modulated BMDCs.

401 Examination of effector CD4<sup>+</sup> T cell populations in splenic cell cultured in the presence  
402 of Con-A showed that treatment with BMDC<sub>CTLA4-Ig</sub> resulted in a significant reduction  
403 in the frequency of IL-17<sup>+</sup> and IFN- $\gamma$ <sup>+</sup> cells and in the elevation of CD4<sup>+</sup> IL-10<sup>+</sup> and  
404 CD4<sup>+</sup> Foxp3<sup>+</sup> T cells. Frequency of GATA-3 expressing cells was higher in the splenic  
405 cell cultures of mice treated with CTLA4-Ig modulated BMDCs. However, TCD4<sup>+</sup> cells  
406 expressing the Th1/Treg cell associated RORc and T-bet transcription factors did not  
407 show significant variations between the different treatments.

408 Treg cells play a key role in the control of immune responses to autoantigens as well as  
409 on those that act upon pathogens, commensals, tumors, and grafts. Such control is

410 exerted by the ability of Treg cells to accumulate in inflamed areas and to adapt to the  
411 environment, being particularly critical in tissues repeatedly exposed to the presence of  
412 microbes and environmental aggressions such as the gastrointestinal tract and skin  
413 (54,55). It has been shown that the canonical Th2 transcription factor GATA3 is  
414 selectively expressed in Treg residing in barrier sites including the gastrointestinal tract  
415 and the skin, being fundamental to maintain high levels of Foxp3 expression in various  
416 polarized or inflammatory settings (56). Corroborating these data, we observed a  
417 significantly higher frequency of Treg cells in spleen cell cultures from mice receiving  
418 only TNBS and those from mice pretreated with BMDC<sub>CTLA4-Ig</sub>. However, a significant  
419 increase in cells expressing both Foxp3 and GATA-3 was observed only in the group  
420 that received BMDC<sub>CTLA4-Ig</sub>, indicating its influence in promoting a more efficient  
421 control of the inflammatory response induced by TNBS.

422 Although the frequencies of IL-17 and IFN- $\gamma$ -secreting T cells were reduced in splenic  
423 cell cultures of mice pretreated with BMDC<sub>CTLA4-Ig</sub>, no significant differences were  
424 observed in the levels of these cytokines in spleen cell culture supernatants from mice  
425 pretreated with either BMDC<sub>CTLA4-Ig</sub> or BMDC<sub>naïve</sub>. On the other hand, IL-4, whose  
426 production is controlled by GATA-3 expression, was detected only in spleen cell  
427 cultures of BMDC<sub>CTLA4-Ig</sub> treated mice. In the spleen cell cultures from mice pretreated  
428 with BMDC<sub>naïve</sub> it was possible to observe the higher levels of IL-6, but it was also the  
429 one that presented the highest levels of IL-10, whose production is controlled by the  
430 transcription factor Foxp3. Thus, while splenic cell cultures of BMDC<sub>CTLA4-Ig</sub> pretreated  
431 mice had higher levels of IL-4, those of mice pretreated with BMDC<sub>naïve</sub> had higher  
432 levels of IL-10. The significance of these findings still needs further investigation.

433 The presence of cells expressing the transcription factor PU.1, a regulator of the  
434 development of Th9 cells, has been observed in the intestinal lamina propria of patients  
435 with ulcerative colitis and Crohn's disease (57). Although we did not examine the  
436 frequency of Th9 cells in the splenic cell cultures of the different groups studied here,  
437 we found that the production of IL-9 in the supernatants of the spleen cell cultures from  
438 mice treated with BMDC<sub>CTLA4-Ig</sub> was significantly more reduced than in other cell  
439 cultures, including those from mice that received only the vehicle.

440 IL-9 is a cytokine that may act differently on Th17 cells or Treg cells, as an inducer or  
441 regulator of tissue inflammation. IL-9 associated with TGF- $\beta$  may drive the  
442 differentiation of Th17 cells. In turn, Th17 cells can secrete IL-9, which affects  
443 inflammatory response *in vivo*. IL-9 also acts *in vitro* on FoxP3<sup>+</sup>CD4<sup>+</sup> Treg cells,  
444 increasing their suppressive function. This activation occurs by signaling pathways  
445 associated with transcription factors STAT3 and STAT5 (58).

446 Reports show that in addition to cytokines released by Th1 and Th17 cells, IL-9 is also  
447 involved in T cell-mediated experimental colitis, promoting mucosal ulceration and  
448 chronic inflammation. In this way, Th9 cells represent a potential target for the  
449 treatment of chronic intestinal inflammation (22,59).

450 It is known that acute and chronic intake of alcohol produces sensitive changes in the  
451 intestinal mucosa, contributing to the installation or worsening of IBD already installed,  
452 both in humans and in experimental models (60). The literature, however, does not  
453 report on possible changes due to the use of 50% alcohol as a control of the instillation  
454 of TNBS dissolved in this vehicle. However, we have observed that the instillation of

455 50% ethanol is not as innocuous as its use has resulted in some changes of an  
456 inflammatory nature such as elevated TNF- $\alpha$ , IL-9 and IL-17 levels in the  
457 corresponding splenic cell cultures, although important differences were observed in the  
458 instillation of TNBS/50% ethanol compared to ethanol instillation alone.

459 The blockade of the CTLA4 molecule is already described as a potential therapy for  
460 tumor treatment (61–63). However, studies related to the blockade of this molecule by  
461 the direct administration of CTLA4-Ig for the treatment of inflammatory bowel diseases  
462 did not present promising results (64). In this context, the use of CTLA4-Ig-modulated  
463 dendritic cells, instead of the direct application of this inhibitor, may be a clinical  
464 alternative to treat patients with IBD. Studies have shown that the CTLA4-Ig fusion  
465 protein affects the functioning of DCs through the IDO pathway, promoting a regulatory  
466 phenotype in this population (9,26,47). Dendritic cell therapies for immunomodulation  
467 have been presented as a therapeutic option under study, due to the great advance in the  
468 use of these cellular populations in the treatments of autoimmune diseases (65,66).  
469 Wang and colleagues observed that BMDCs generated from mouse bone marrow and  
470 stimulated with GM-CSF have a mature DC cell profile and can be used in antitumor  
471 immunity studies. Adherent cells from these cultures have macrophage properties and  
472 may be used to induce tolerance, whereas mixed cells may potentiate tolerogenicity or  
473 pro-tumorigenic responses. Immature DCs have a strong migration and capture  
474 capabilities, while mature DCs activate naïve T cells and express high levels of  
475 costimulatory adhesion molecules and cytokines (67).

476 Taken together, our results allow us to conclude that adoptive transfer of CTLA4-Ig-  
477 modulated BMDC improves clinical signs of TNBS-induced colitis. Histological

478 analysis of intestinal segments showed that the adoptive transfer of CTLA4-Ig-  
479 modulated BMDC reduced the infiltration of inflammatory cells, particularly  
480 macrophages, and improved tissue damage in the colon. Adoptive transfer of CTLA4-  
481 Ig-modulated BMDC was also able to alter the immunological profile of activated  
482 splenic cells in vitro. Spleen cell culture of CTLA4-Ig-modulated BMDC-pretreated  
483 mice showed a reduction in the frequency of CD4<sup>+</sup> T cells producing IFN- $\gamma$  and IL-17  
484 and IL-9 secretion, as well as increased frequency of Treg cells and IL-10 production.  
485 To our knowledge, this is the first description of the beneficial effects of treatment with  
486 CTLA4-Ig modulated BMDC in experimental colitis at the histological and  
487 immunological level.

#### 488 **Data Availability**

489 The research data used to support the findings of this study are included within the  
490 article.

#### 491 **Conflict of Interest**

492 The authors declare that the research was conducted in the absence of any commercial  
493 or financial relationships that could be construed as a potential conflict of interest.

#### 494 **Funding Statement**

495 Grant (#2013/20258-2) and fellowships (#2014/16701-0, #2014/08591-0,  
496 #2014/086192, #2015/09326-1) were obtained from São Paulo Research Foundation  
497 (FAPESP) and Coordination for the Improvement of Higher Education Personnel  
498 (CAPES).

499    **REFERENCES**

- 500           1.       Metzler B, Burkhart C, Wraith DC. Phenotypic analysis of CTLA-4 and  
501           CD28 expression during transient peptide-induced T cell activation in vivo. *Int*  
502           *Immunol* [Internet]. 1999;11(5):667–75. Available from:  
503           <https://www.ncbi.nlm.nih.gov/pubmed/10330272>
- 504           2.       Butte MJ, Keir ME, Phamduy TB, Sharpe AH, Freeman GJ.  
505           Programmed Death-1 Ligand 1 Interacts Specifically with the B7-1  
506           Costimulatory Molecule to Inhibit T Cell Responses. *Immunity* [Internet].  
507           2007;27(1):111–22. Available from:  
508           <https://www.ncbi.nlm.nih.gov/pmc/articles/PMC2707944/>
- 509           3.       Munn DH, Sharma MD, Mellor AL. Ligation of B7-1/B7-2 by Human  
510           CD4+ T Cells Triggers Indoleamine 2,3-Dioxygenase Activity in Dendritic Cells.  
511           *J Immunol* [Internet]. 2004 Mar 19 [cited 2015 Mar 16];172(7):4100–10.  
512           Available from: <http://www.ncbi.nlm.nih.gov/pubmed/15034022>
- 513           4.       Koorella C, Nair JR, Murray ME, Carlson LM, Watkins SK, Lee KP.  
514           Novel regulation of CD80/CD86-induced phosphatidylinositol 3-kinase signaling  
515           by NOTCH1 protein in interleukin-6 and indoleamine 2,3-dioxygenase  
516           production by dendritic cells. *J Biol Chem* [Internet]. 2014 Mar 14 [cited 2015  
517           Feb 27];289(11):7747–62. Available from:  
518           [http://www.pubmedcentral.nih.gov/articlerender.fcgi?artid=3953285&tool=pmce](http://www.pubmedcentral.nih.gov/articlerender.fcgi?artid=3953285&tool=pmcentrez&rendertype=abstract)  
519           [ntrez&rendertype=abstract](http://www.pubmedcentral.nih.gov/articlerender.fcgi?artid=3953285&tool=pmcentrez&rendertype=abstract)



- 520           5.       Cutolo M, Soldano S, Montagna P, Sulli A, Serio B, Villaggio B, et al.  
521           CTLA4-Ig interacts with cultured synovial macrophages from rheumatoid  
522           arthritis patients and downregulates cytokine production. *Arthritis Res Ther*  
523           [Internet]. 2009;11(6):R176. Available from:  
524           <https://www.ncbi.nlm.nih.gov/pmc/articles/PMC3003520/>
- 525           6.       Perez N, Karumuthil-Meilethil S, Li R, Prabhakar BS, Holterman MJ,  
526           Vasu C. Preferential costimulation by CD80 results in IL-10-dependent TGF-  
527           beta1(+) -adaptive regulatory T cell generation. *J Immunol* [Internet]. 2008 May  
528           15 [cited 2014 Dec 29];180(10):6566–76. Available from:  
529           [http://www.pubmedcentral.nih.gov/articlerender.fcgi?artid=2435403&tool=pmce](http://www.pubmedcentral.nih.gov/articlerender.fcgi?artid=2435403&tool=pmcentrez&rendertype=abstract)  
530           ntrez&rendertype=abstract
- 531           7.       Ueda H, Howson JMM, Esposito L, Heward J, Snook H, Chamberlain G,  
532           et al. Association of the T-cell regulatory gene CTLA4 with susceptibility to  
533           autoimmune disease. *Nature* [Internet]. 2003 May 29 [cited 2015 Oct  
534           16];423(6939):506–11. Available from:  
535           <http://www.ncbi.nlm.nih.gov/pubmed/12724780>
- 536           8.       Abram DM, Fernandes LGRL, Ramos Filho AAC, Simioni PUPU,  
537           Moitinho Abram D, Fernandes LGRL, et al. The modulation of enzyme  
538           indoleamine 2,3-dioxygenase from dendritic cells for the treatment of type 1  
539           diabetes mellitus. *Drug Des Devel Ther* [Internet]. 2017 Jul [cited 2018 Sep  
540           21];2171–8. Available from: [https://www.dovepress.com/the-modulation-of-](https://www.dovepress.com/the-modulation-of-enzyme-indoleamine-23-dioxygenase-from-dendritic-cel-peer-reviewed-article-)  
541           enzyme-indoleamine-23-dioxygenase-from-dendritic-cel-peer-reviewed-article-

542 DDDT

543 9. Cutolo M, Nadler SG. Advances in CTLA-4-Ig-mediated modulation of  
544 inflammatory cell and immune response activation in rheumatoid arthritis.  
545 *Autoimmun Rev* [Internet]. 2013 May [cited 2015 Feb 18];12(7):758–67.  
546 Available from: <http://www.ncbi.nlm.nih.gov/pubmed/23340277>

547 10. De Mattos BRR, Garcia MPG, Nogueira JB, Paiatto LNLN,  
548 Albuquerque CG, Souza CL, et al. Inflammatory Bowel Disease: An Overview  
549 of Immune Mechanisms and Biological Treatments. *Mediators Inflamm*  
550 [Internet]. 2015 Jan 4 [cited 2015 Sep 8];2015:1–11. Available from:  
551 <http://www.hindawi.com/journals/mi/aa/493012/>

552 11. Corridoni D, Arseneau KO, Cominelli F. Inflammatory bowel disease.  
553 *Immunol Lett* [Internet]. 2014 Oct [cited 2016 Jan 12];161(2):231–5. Available  
554 from:  
555 [http://www.pubmedcentral.nih.gov/articlerender.fcgi?artid=4401421&tool=pmce](http://www.pubmedcentral.nih.gov/articlerender.fcgi?artid=4401421&tool=pmcentrez&rendertype=abstract)  
556 [ntrez&rendertype=abstract](http://www.pubmedcentral.nih.gov/articlerender.fcgi?artid=4401421&tool=pmcentrez&rendertype=abstract)

557 12. Aujnarain A, Mack DR, Benchimol EI. The role of the environment in  
558 the development of pediatric inflammatory bowel disease. *Curr Gastroenterol*  
559 *Rep* [Internet]. 2013 Jun [cited 2014 Dec 12];15(6):326. Available from:  
560 <http://www.ncbi.nlm.nih.gov/pubmed/23640032>

561 13. Tontini GE. Differential diagnosis in inflammatory bowel disease colitis:  
562 State of the art and future perspectives. *World J Gastroenterol* [Internet]. 2015

- 563 Jan 7 [cited 2015 Jan 10];21(1):21. Available from:  
564 [http://www.pubmedcentral.nih.gov/articlerender.fcgi?artid=4284336&tool=pmce](http://www.pubmedcentral.nih.gov/articlerender.fcgi?artid=4284336&tool=pmcentrez&rendertype=abstract)  
565 [ntrez&rendertype=abstract](http://www.pubmedcentral.nih.gov/articlerender.fcgi?artid=4284336&tool=pmcentrez&rendertype=abstract)
- 566 14. Khan A, Fu H, Tan LA, Harper JE, Beutelspacher SC, Larkin DFP, et al.  
567 Dendritic cell modification as a route to inhibiting corneal graft rejection by the  
568 indirect pathway of allorecognition. *Eur J Immunol* [Internet]. 2013 Mar [cited  
569 2015 Jun 12];43(3):734–46. Available from:  
570 [http://www.pubmedcentral.nih.gov/articlerender.fcgi?artid=3615172&tool=pmce](http://www.pubmedcentral.nih.gov/articlerender.fcgi?artid=3615172&tool=pmcentrez&rendertype=abstract)  
571 [ntrez&rendertype=abstract](http://www.pubmedcentral.nih.gov/articlerender.fcgi?artid=3615172&tool=pmcentrez&rendertype=abstract)
- 572 15. Najafian N, Sayegh MH. CTLA4-Ig: a novel immunosuppressive agent.  
573 *Expert Opin Investig Drugs* [Internet]. 2000;9(9):2147–57. Available from:  
574 <http://www.ncbi.nlm.nih.gov/pubmed/11060799>
- 575 16. Steurer W, Nickerson PW, Steele AW, Steiger J, Zheng XX, Strom TB.  
576 Ex vivo coating of islet cell allografts with murine CTLA4/Fc promotes graft  
577 tolerance. *J Immunol* [Internet]. 1995;155(3):1165–74. Available from:  
578 <http://www.ncbi.nlm.nih.gov/pubmed/7543517>
- 579 17. Yang DF, Qiu WH, Zhu HF, Lei P, Wen X, Dai H, et al. CTLA4-Ig-  
580 modified dendritic cells inhibit lymphocyte-mediated alloimmune responses and  
581 prolong the islet graft survival in mice. *Transpl Immunol* [Internet]. 2008;19(3–  
582 4):197–201. Available from:  
583 <http://www.ncbi.nlm.nih.gov/pubmed/18667318>  
584 [http://ac.els-cdn.com/S0966327408000294/1-s2.0-S0966327408000294-](http://www.ncbi.nlm.nih.gov/pubmed/18667318)

- 585 main.pdf?\_tid=1f04f6c0-df97-11e3-befe-  
586 00000aab0f6b&acdnat=1400532771\_9f1bf87c9da1bf8eeaae21083b16bd8f
- 587 18. Gilson CR, Milas Z, Gangappa S, Hollenbaugh D, Pearson TC, Ford  
588 ML, et al. Anti-CD40 monoclonal antibody synergizes with CTLA4-Ig in  
589 promoting long-term graft survival in murine models of transplantation. *J*  
590 *Immunol* [Internet]. 2009 Aug 1 [cited 2015 Jun 16];183(3):1625–35. Available  
591 from:  
592 [http://www.pubmedcentral.nih.gov/articlerender.fcgi?artid=2828346&tool=pmce](http://www.pubmedcentral.nih.gov/articlerender.fcgi?artid=2828346&tool=pmcentrez&rendertype=abstract)  
593 [ntrez&rendertype=abstract](http://www.pubmedcentral.nih.gov/articlerender.fcgi?artid=2828346&tool=pmcentrez&rendertype=abstract)
- 594 19. ... ASITS in D, 2019 undefined. *Disease Interception in Autoimmune*  
595 *Diseases: From a Conceptual Framework to Practical Implementation*.  
596 [books.google.com](https://books.google.com) [Internet]. [cited 2019 Feb 20]; Available from:  
597 [https://books.google.com.br/books?hl=pt-](https://books.google.com.br/books?hl=pt-BR&lr=&id=uNyGDwAAQBAJ&oi=fnd&pg=PA1&dq=ctla4-ig+tolerance+colitis&ots=NeTRlZ1bvJ&sig=3wf0H2u9tjKcXGtdgXrPzM9xPyI)  
598 [BR&lr=&id=uNyGDwAAQBAJ&oi=fnd&pg=PA1&dq=ctla4-](https://books.google.com.br/books?hl=pt-BR&lr=&id=uNyGDwAAQBAJ&oi=fnd&pg=PA1&dq=ctla4-ig+tolerance+colitis&ots=NeTRlZ1bvJ&sig=3wf0H2u9tjKcXGtdgXrPzM9xPyI)  
599 [ig+tolerance+colitis&ots=NeTRlZ1bvJ&sig=3wf0H2u9tjKcXGtdgXrPzM9xPyI](https://books.google.com.br/books?hl=pt-BR&lr=&id=uNyGDwAAQBAJ&oi=fnd&pg=PA1&dq=ctla4-ig+tolerance+colitis&ots=NeTRlZ1bvJ&sig=3wf0H2u9tjKcXGtdgXrPzM9xPyI)
- 600 20. Elson CO, Sartor RB, Tennyson GS, Riddell Ii RH, Gonçalves CCM,  
601 Hernandez L, et al. Insights from advances in research of chemically induced  
602 experimental models of human inflammatory bowel disease. *World J*  
603 *Gastroenterol*. 1995;13(42):5581–93.
- 604 21. Oh SY, Cho K-A, Kang JL, Kim KH, Woo S-Y. Comparison of  
605 experimental mouse models of inflammatory bowel disease. *Int J Mol Med*  
606 [Internet]. 2014 Feb [cited 2016 Jan 6];33(2):333–40. Available from:

- 607 <http://www.ncbi.nlm.nih.gov/pubmed/24285285>
- 608 22. Gerlach K, Hwang Y, Nikolaev A, Atreya R, Dornhoff H, Steiner S, et  
609 al. TH9 cells that express the transcription factor PU.1 drive T cell-mediated  
610 colitis via IL-9 receptor signaling in intestinal epithelial cells. *Nat Immunol*  
611 [Internet]. 2014 Jul 8 [cited 2014 Dec 3];15(7):676–86. Available from:  
612 <http://www.ncbi.nlm.nih.gov/pubmed/24908389>
- 613 23. Paiatto LN, Silva FGD, Simioni PU, Yamada ÁT, Tamashiro WMSC,  
614 Simioni PU. Adoptive transfer of dendritic cells expressing CD11c reduces the  
615 immunological response associated with experimental colitis in BALB / c mice.  
616 Chamaillard M, editor. *PLoS One* [Internet]. 2018 May 8 [cited 2018 Sep  
617 21];13(5):1–15. Available from: <http://dx.plos.org/10.1371/journal.pone.0196994>
- 618 24. Paiatto LNLN, Silva FGDFGDFGD, Bier J, Brochetto-Braga MR,  
619 Yamada ÁTÁT, Tamashiro WMSCWMSCSC, et al. Oral tolerance induced by  
620 OVA intake ameliorates TNBS-induced colitis in Mice. Ashour HM, editor.  
621 *PLoS One* [Internet]. 2017 Jan 18 [cited 2017 Jan 24];12(1):e0170205. Available  
622 from: <http://dx.plos.org/10.1371/journal.pone.0170205>
- 623 25. Matteoli G, Mazzini E, Iliev ID, Mileti E, Fallarino F, Puccetti P, et al.  
624 Gut CD103+ dendritic cells express indoleamine 2,3-dioxygenase which  
625 influences T regulatory/T effector cell balance and oral tolerance induction. *Gut*  
626 [Internet]. 2010 May [cited 2013 Jun 7];59(5):595–604. Available from:  
627 <http://gut.bmj.com/cgi/doi/10.1136/gut.2009.185108>

- 628 26. Mayer L, Kaser A, Blumberg RS. Dead on arrival: understanding the  
629 failure of CTLA4-immunoglobulin therapy in inflammatory bowel disease.  
630 Gastroenterology [Internet]. 2012 Jul [cited 2014 Dec 12];143(1):13–7. Available  
631 from:  
632 [http://www.pubmedcentral.nih.gov/articlerender.fcgi?artid=3392152&tool=pmce](http://www.pubmedcentral.nih.gov/articlerender.fcgi?artid=3392152&tool=pmcentrez&rendertype=abstract)  
633 [ntrez&rendertype=abstract](http://www.pubmedcentral.nih.gov/articlerender.fcgi?artid=3392152&tool=pmcentrez&rendertype=abstract)
- 634 27. Qualls JE, Tuna H, Kaplan AM, Cohen D a. Suppression of experimental  
635 colitis in mice by CD11c+ dendritic cells. Inflamm Bowel Dis [Internet]. 2009  
636 Feb [cited 2014 Nov 24];15(2):236–47. Available from:  
637 <http://www.ncbi.nlm.nih.gov/pubmed/18839426>
- 638 28. Linsley PS, Brady W, Urnes M, Grosmaire LS, Damle NK, Ledbetter  
639 JA. CTLA-4 is a second receptor for the B cell activation antigen B7. J Exp Med  
640 [Internet]. 1991;174(3):561–9. Available from:  
641 <http://www.ncbi.nlm.nih.gov/pubmed/1714933>[http://www.pubmedcentral.ni](http://www.pubmedcentral.nih.gov/articlerender.fcgi?artid=PMC2118936)  
642 [h.gov/articlerender.fcgi?artid=PMC2118936](http://www.pubmedcentral.nih.gov/articlerender.fcgi?artid=PMC2118936)
- 643 29. Simioni PUPUPU, Fernandes LGRLGRL, Gabriel DLL, Tamashiro  
644 WMSCMSC. Effect of aging and oral tolerance on dendritic cell function.  
645 Brazilian J ... [Internet]. 2010 Jan [cited 2015 Mar 27];43(1):68–76. Available  
646 from: <http://www.ncbi.nlm.nih.gov/pubmed/19967261>
- 647 30. Simioni PUPUU, Fernandes LGRGRLG, Tamashiro WMWMSCMWM.  
648 Downregulation of L-arginine metabolism in dendritic cells induces tolerance to  
649 exogenous antigen. Int J Immunopathol Pharmacol [Internet]. 2017 Nov 30 [cited

650 2016 Dec 2];30(1):44–57. Available from:

651 <https://www.ncbi.nlm.nih.gov/pubmed/27903843>

652 31. Lutz MB, Kukutsch N a., Menges M, Rössner S, Schuler G, Rößner S, et

653 al. Culture of bone marrow cells in GM-CSF plus high doses of

654 lipopolysaccharide generates exclusively immature dendritic cells which induce

655 alloantigen-specific CD4 T cell anergy in vitro. *Eur J Immunol* [Internet]. 2000

656 Apr [cited 2015 Feb 17];30(4):1048–52. Available from:

657 <http://www.ncbi.nlm.nih.gov/pubmed/10760792>

658 32. Simioni PUPUU, Fernandes LGRGRLG, Tamashiro WMSCMWM, Lutz

659 MB, Kukutsch N a., Menges M, et al. An advanced culture method for generating

660 large quantities of highly pure dendritic cells from mouse bone marrow. *Eur J*

661 *Immunol* [Internet]. 2017 Nov 1 [cited 2015 Feb 6];30(1):1048–52. Available

662 from: <http://www.ncbi.nlm.nih.gov/pubmed/10037236>

663 33. Lutz MB, Kukutsch N, Ogilvie AL, Rössner S, Koch F, Romani N, et al.

664 An advanced culture method for generating large quantities of highly pure

665 dendritic cells from mouse bone marrow. *J Immunol Methods* [Internet]. 1999

666 Feb 1 [cited 2015 Feb 6];223(1):77–92. Available from:

667 <http://www.ncbi.nlm.nih.gov/pubmed/10037236>

668 34. E Silva FGD, Paiatto LN, Yamada AT, Netto FM, Simioni PU,

669 Tamashiro WMSC. Intake of Protein Hydrolysates and Phenolic Fractions

670 Isolated from Flaxseed Ameliorates TNBS-Induced Colitis. *Mol Nutr Food Res*

671 [Internet]. 2018 Aug 9 [cited 2018 Aug 16];e1800088. Available from:

672 <http://doi.wiley.com/10.1002/mnfr.201800088>

673 35. Masterson JC, McNamee EN, Fillon SA, Hosford L, Harris R, Fernando  
674 SD, et al. Eosinophil-mediated signalling attenuates inflammatory responses in  
675 experimental colitis. *Gut* [Internet]. 2014 Sep 10 [cited 2015 Mar 9];*gutjnl-2014-*  
676 *306998-*. Available from: [http://gut.bmj.com/content/early/2014/09/10/gutjnl-](http://gut.bmj.com/content/early/2014/09/10/gutjnl-2014-306998.long)  
677 *2014-306998.long*

678 36. Zingarelli B, Szabó C, Salzman AL. Reduced oxidative and nitrosative  
679 damage in murine experimental colitis in the absence of inducible nitric oxide  
680 synthase. *Gut* [Internet]. 1999 Aug [cited 2015 Mar 9];*45(2):199–209*. Available  
681 from:  
682 [http://www.pubmedcentral.nih.gov/articlerender.fcgi?artid=1727621&tool=pmce](http://www.pubmedcentral.nih.gov/articlerender.fcgi?artid=1727621&tool=pmcentrez&rendertype=abstract)  
683 [ntrez&rendertype=abstract](http://www.pubmedcentral.nih.gov/articlerender.fcgi?artid=1727621&tool=pmcentrez&rendertype=abstract)

684 37. van der Marel S, Majowicz A, Kwikkers K, van Logtenstein R, te Velde  
685 AA, De Groot AS, et al. Adeno-associated virus mediated delivery of Tregitope  
686 167 ameliorates experimental colitis. *World J Gastroenterol* [Internet]. 2012 Aug  
687 28 [cited 2015 Feb 18];*18(32):4288–99*. Available from:  
688 [http://www.pubmedcentral.nih.gov/articlerender.fcgi?artid=3436043&tool=pmce](http://www.pubmedcentral.nih.gov/articlerender.fcgi?artid=3436043&tool=pmcentrez&rendertype=abstract)  
689 [ntrez&rendertype=abstract](http://www.pubmedcentral.nih.gov/articlerender.fcgi?artid=3436043&tool=pmcentrez&rendertype=abstract)

690 38. Shin J-S, Cho E-J, Choi H-E, Seo J-H, An H-J, Park H-J, et al. Anti-  
691 inflammatory effect of a standardized triterpenoid-rich fraction isolated from  
692 *Rubus coreanus* on dextran sodium sulfate-induced acute colitis in mice and LPS-  
693 induced macrophages. *J Ethnopharmacol* [Internet]. 2014 Dec 2 [cited 2015 Feb



- 694 18];158 Pt A:291–300. Available from:  
695 <http://www.ncbi.nlm.nih.gov/pubmed/25446582>
- 696 39. Neurath MF, Fuss I, Kelsall BL, Stüber E, Strober W. Antibodies to  
697 interleukin 12 abrogate established experimental colitis in mice. *J Exp Med*  
698 [Internet]. 1995 Nov 1 [cited 2016 Dec 2];182(5):1281–90. Available from:  
699 <http://www.ncbi.nlm.nih.gov/pubmed/7595199>
- 700 40. Neurath MF, Fuss I, Kelsall BL, Presky DH, Waegell W, Strober W.  
701 Experimental granulomatous colitis in mice is abrogated by induction of TGF-  
702 beta-mediated oral tolerance. *J Exp Med* [Internet]. 1996 Jun 1 [cited 2015 Feb  
703 18];183(6):2605–16. Available from:  
704 <http://www.ncbi.nlm.nih.gov/pubmed/8676081>
- 705 41. Thomé R, Fernandes LGRLGRL, Mineiro MFMFM, Simioni PUPU,  
706 Joazeiro PPPP, Tamashiro WM da SCWMS. Oral tolerance and OVA-induced  
707 tolerogenic dendritic cells reduce the severity of collagen/ovalbumin-induced  
708 arthritis in mice. *Cell Immunol* [Internet]. 2012 Nov [cited 2015 Feb  
709 5];280(1):113–23. Available from:  
710 <http://linkinghub.elsevier.com/retrieve/pii/S0008874912002201>
- 711 42. Horton C, Shanmugarajah K, Fairchild PJ. Harnessing the properties of  
712 dendritic cells in the pursuit of immunological tolerance [Internet]. Vol. 40,  
713 *Biomedical Journal*. 2017. p. 80–93. Available from:  
714 <https://www.ncbi.nlm.nih.gov/pmc/articles/PMC6138597/>

- 715 43. Pedersen AE, Schmidt EGW, Gad M, Poulsen SS, Claesson MH.  
716 Dexamethasone/1 $\alpha$ -25-dihydroxyvitamin D3-treated dendritic cells suppress  
717 colitis in the SCID T-cell transfer model. *Immunology* [Internet]. 2009 Jul [cited  
718 2016 Dec 2];127(3):354–64. Available from:  
719 <http://www.ncbi.nlm.nih.gov/pubmed/19019085>
- 720 44. Pedersen AE, Gad M, Kristensen NN, Haase C, Nielsen CH, Claesson  
721 MH. Tolerogenic dendritic cells pulsed with enterobacterial extract suppress  
722 development of colitis in the severe combined immunodeficiency transfer model.  
723 *Immunology* [Internet]. 2007 Aug [cited 2013 Jul 24];121(4):526–32. Available  
724 from: <http://www.ncbi.nlm.nih.gov/pubmed/17428312>
- 725 45. Rochman Y, Yukawa M, Kartashov A V, Barski A. Functional  
726 characterization of human T cell hyporesponsiveness induced by CTLA4-Ig.  
727 *PLoS One* [Internet]. 2015 Jan [cited 2015 Jun 15];10(4):e0122198. Available  
728 from:  
729 [http://www.pubmedcentral.nih.gov/articlerender.fcgi?artid=4393265&tool=pmce](http://www.pubmedcentral.nih.gov/articlerender.fcgi?artid=4393265&tool=pmcentrez&rendertype=abstract)  
730 [ntrez&rendertype=abstract](http://www.pubmedcentral.nih.gov/articlerender.fcgi?artid=4393265&tool=pmcentrez&rendertype=abstract)
- 731 46. Mayer E, Hölzl M, Ahmadi S, Dillinger B, Pilat N, Fuchs D, et al.  
732 CTLA4-Ig immunosuppressive activity at the level of dendritic cell/T cell  
733 crosstalk. *Int Immunopharmacol* [Internet]. 2013 Mar [cited 2013 Jun  
734 23];15(3):638–45. Available from:  
735 <http://dx.doi.org/10.1016/j.intimp.2013.02.007>
- 736 47. Ko HJ, Cho M La, Lee SY, Oh HJ, Heo YJ, Moon YM, et al. CTLA4-Ig

737 modifies dendritic cells from mice with collagen-induced arthritis to increase the  
738 CD4+CD25+Foxp3+ regulatory T cell population. *J Autoimmun.*  
739 2010;34(2):111–20.

740 48. Loeuillard E, Bertrand J, Herranen A, Melchior C, Guérin C, Coëffier M,  
741 et al. 2,4,6-trinitrobenzene sulfonic acid-induced chronic colitis with fibrosis and  
742 modulation of TGF- $\beta$ 1 signaling. *World J Gastroenterol* [Internet]. 2014 Dec 28  
743 [cited 2016 Jan 5];20(48):18207–15. Available from:  
744 [http://www.pubmedcentral.nih.gov/articlerender.fcgi?artid=4277958&tool=pmce](http://www.pubmedcentral.nih.gov/articlerender.fcgi?artid=4277958&tool=pmcentrez&rendertype=abstract)  
745 [ntrez&rendertype=abstract](http://www.pubmedcentral.nih.gov/articlerender.fcgi?artid=4277958&tool=pmcentrez&rendertype=abstract)

746 49. Wu F, Chakravarti S. Differential Expression of Inflammatory and  
747 Fibrogenic Genes and Their Regulation by NF- $\kappa$ B Inhibition in a Mouse Model of  
748 Chronic Colitis. *J Immunol* [Internet]. 2007 Nov 2 [cited 2016 Jan  
749 5];179(10):6988–7000. Available from:  
750 <http://www.jimmunol.org/content/179/10/6988.full>

751 50. Miura S, Hokari R, Tsuzuki Y. Mucosal immunity in gut and lymphoid  
752 cell trafficking. *Ann Vasc Dis* [Internet]. 2012 Jan [cited 2016 Jan 7];5(3):275–  
753 81. Available from:  
754 [http://www.pubmedcentral.nih.gov/articlerender.fcgi?artid=3595844&tool=pmce](http://www.pubmedcentral.nih.gov/articlerender.fcgi?artid=3595844&tool=pmcentrez&rendertype=abstract)  
755 [ntrez&rendertype=abstract](http://www.pubmedcentral.nih.gov/articlerender.fcgi?artid=3595844&tool=pmcentrez&rendertype=abstract)

756 51. Guo X, Wang WP, Ko JKS, Cho CH. Involvement of neutrophils and  
757 free radicals in the potentiating effects of passive cigarette smoking on  
758 inflammatory bowel disease in rats. *Gastroenterology* [Internet]. 1999 Oct 10

- 759 [cited 2016 Jan 5];117(4):884–92. Available from:  
760 <http://www.gastrojournal.org/article/S0016508599703471/fulltext>
- 761 52. Seo HG, Takata I, Nakamura M, Tatsumi H, Suzuki K, Fujii J, et al.  
762 Induction of nitric oxide synthase and concomitant suppression of superoxide  
763 dismutases in experimental colitis in rats. *Arch Biochem Biophys* [Internet].  
764 1995 Dec 1 [cited 2016 Jan 5];324(1):41–7. Available from:  
765 <http://www.ncbi.nlm.nih.gov/pubmed/7503557>
- 766 53. Yue G, Lai PS, Yin K, Sun FF, Nagele RG, Liu X, et al. Colon epithelial  
767 cell death in 2,4,6-trinitrobenzenesulfonic acid-induced colitis is associated with  
768 increased inducible nitric-oxide synthase expression and peroxynitrite  
769 production. *J Pharmacol Exp Ther* [Internet]. 2001 Jun [cited 2016 Jan  
770 5];297(3):915–25. Available from:  
771 <http://www.ncbi.nlm.nih.gov/pubmed/11356911>
- 772 54. Sakaguchi S. Naturally arising CD4<sup>+</sup> regulatory t cells for immunologic  
773 self-tolerance and negative control of immune responses. *Annu Rev Immunol*  
774 [Internet]. 2004;22:531–62. Available from:  
775 <http://arjournals.annualreviews.org/doi/full/10.1146/annurev.immunol.21.120601>  
776 [.141122?url\\_ver=Z39.88-](http://arjournals.annualreviews.org/doi/full/10.1146/annurev.immunol.21.120601)  
777 [2003&rfr\\_id=ori:rid:crossref.org&rfr\\_dat=cr\\_pub%3Dpubmed](http://arjournals.annualreviews.org/doi/full/10.1146/annurev.immunol.21.120601)
- 778 55. Campbell DJ, Koch MA. Phenotypical and functional specialization of  
779 FOXP3<sup>+</sup> regulatory T cells. *Nat Rev Immunol* [Internet]. 2011;11(2):119–30.  
780 Available from: <http://www.nature.com/doi/10.1038/nri2916>

- 781 56. Wohlfert EEA, Grainger JRJ, Bouladoux N, Konkel JE, Oldenhove G,  
782 Ribeiro CH, et al. GATA3 controls Foxp3+ regulatory T cell fate during  
783 inflammation in mice. *J Clin ...* [Internet]. 2011;121(11):4503–15. Available  
784 from: <http://www.ncbi.nlm.nih.gov/pmc/articles/PMC3204837/>
- 785 57. Kaplan MH. Th9 cells: Differentiation and disease. *Immunol Rev*  
786 [Internet]. 2013;252(1):104–15. Available from:  
787 <https://onlinelibrary.wiley.com/doi/full/10.1111/imr.12028?sid=nlm%3Apubmed>
- 788 58. Elyaman W, Bradshaw EM, Uyttenhove C, Dardalhon V, Awasthi A,  
789 Imitola J, et al. IL-9 induces differentiation of TH17 cells and enhances function  
790 of FoxP3+ natural regulatory T cells. *Proc Natl Acad Sci U S A* [Internet]. 2009  
791 Aug 4 [cited 2016 Aug 5];106(31):12885–90. Available from:  
792 <http://www.ncbi.nlm.nih.gov/pubmed/19433802>
- 793 59. Gerlach K, McKenzie AN, Neurath MF, Weigmann B. IL-9 regulates  
794 intestinal barrier function in experimental T cell-mediated colitis. *Tissue barriers*  
795 [Internet]. 2015 Apr 3 [cited 2016 Sep 29];3(1–2):e983777. Available from:  
796 <http://www.ncbi.nlm.nih.gov/pubmed/25838986>
- 797 60. Bishhehsari F, Magno E, Swanson G, Desai V, Voigt RM, Forsyth CB, et  
798 al. Alcohol and Gut-Derived Inflammation. *Alcohol Res Curr Rev* [Internet].  
799 2017;38(2):e1-9. Available from:  
800 <https://www.arcr.niaaa.nih.gov/arcr382/article01.pdf>
- 801 61. Berman D, Parker SM, Siegel J, Chasalow SD, Weber J, Galbraith S, et

802 al. Blockade of cytotoxic T-lymphocyte antigen-4 by ipilimumab results in  
803 dysregulation of gastrointestinal immunity in patients with advanced melanoma.  
804 Cancer Immun [Internet]. 2010 Jan [cited 2016 Jan 5];10:11. Available from:  
805 [http://www.pubmedcentral.nih.gov/articlerender.fcgi?artid=2999944&tool=pmce](http://www.pubmedcentral.nih.gov/articlerender.fcgi?artid=2999944&tool=pmcentrez&rendertype=abstract)  
806 [ntrez&rendertype=abstract](http://www.pubmedcentral.nih.gov/articlerender.fcgi?artid=2999944&tool=pmcentrez&rendertype=abstract)

807 62. Daud A. Current and Emerging Perspectives on Immunotherapy for  
808 Melanoma. Semin Oncol [Internet]. 2015 Dec [cited 2015 Nov 27];42:S3–11.  
809 Available from: <http://www.ncbi.nlm.nih.gov/pubmed/26598057>

810 63. Quirk SK, Shure AK, Agrawal DK. Immune-mediated adverse events of  
811 anticytotoxic T lymphocyte-associated antigen 4 antibody therapy in metastatic  
812 melanoma. Transl Res [Internet]. 2015 Nov [cited 2016 Jan 5];166(5):412–24.  
813 Available from: <http://www.ncbi.nlm.nih.gov/pubmed/26118951>

814 64. Kawalec P, Mikrut A, Łopuch S. Systematic review of the effectiveness  
815 of biological therapy for active moderate to severe ulcerative colitis. J  
816 Gastroenterol Hepatol [Internet]. 2014 Jun [cited 2016 Jan 6];29(6):1159–70.  
817 Available from: <http://doi.wiley.com/10.1111/jgh.12563>

818 65. Cools N, Petrizzo A, Smits E, Buonaguro FM, Tornesello ML,  
819 Berneman Z, et al. Dendritic cells in the pathogenesis and treatment of human  
820 diseases: a Janus Bifrons? Immunotherapy [Internet]. 2011 Oct [cited 2015 Feb  
821 17];3(10):1203–22. Available from:  
822 <http://www.ncbi.nlm.nih.gov/pubmed/21995572>

- 823           66.     Harden JL, Egilmez NK. Indoleamine 2,3-Dioxygenase and Dendritic  
824           Cell Tolerogenicity [Internet]. Immunological Investigations NIH Public Access;  
825           Aug 27, 2012 p. 738–64. Available from:  
826           <http://www.ncbi.nlm.nih.gov/pubmed/23017144>
- 827           67.     Wang J, Dai X, Hsu C, Ming C, He Y, Zhang J, et al. Discrimination of  
828           the heterogeneity of bone marrow-derived dendritic cells. Mol Med Rep.  
829           2017;16(5):6787–93.

831 Figures

832 Figure 1

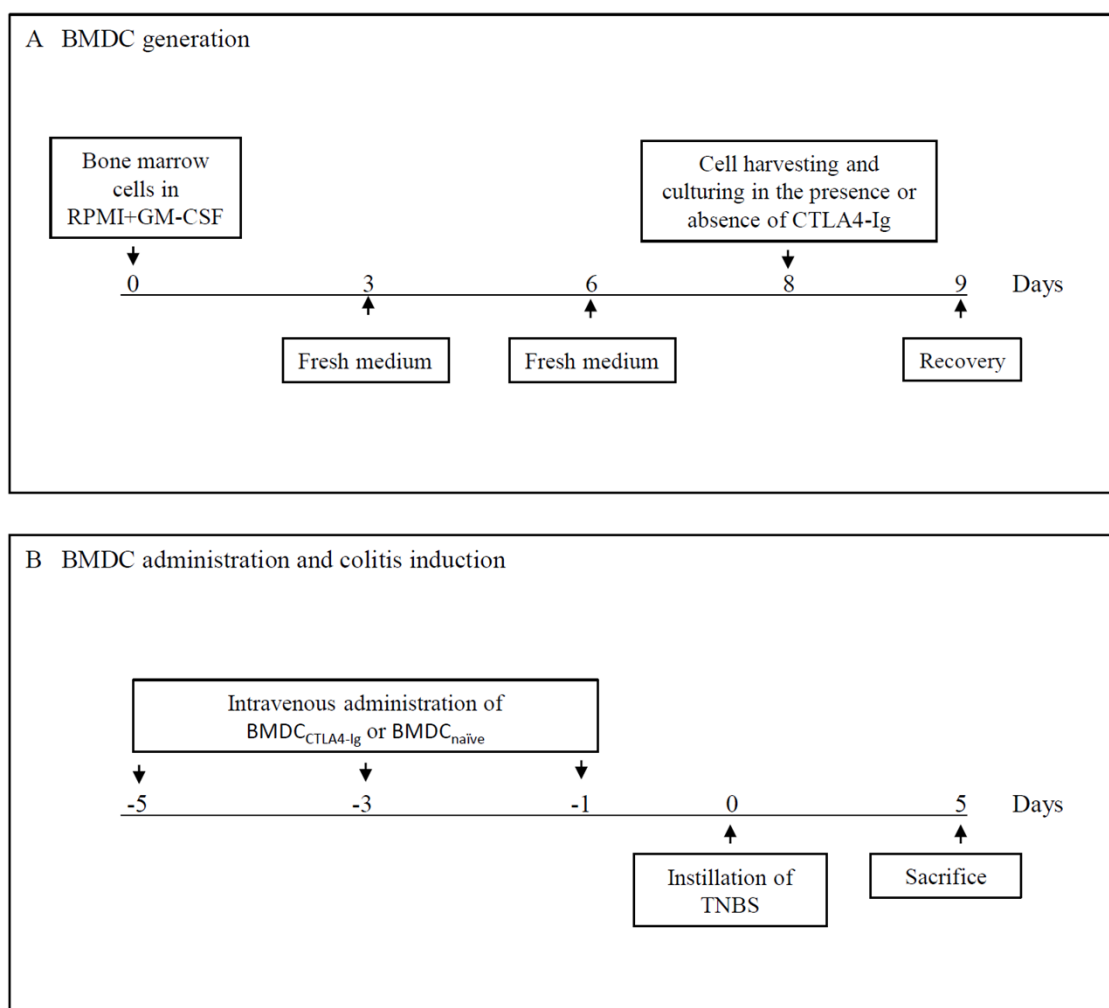

833

834



836 Figure 2:

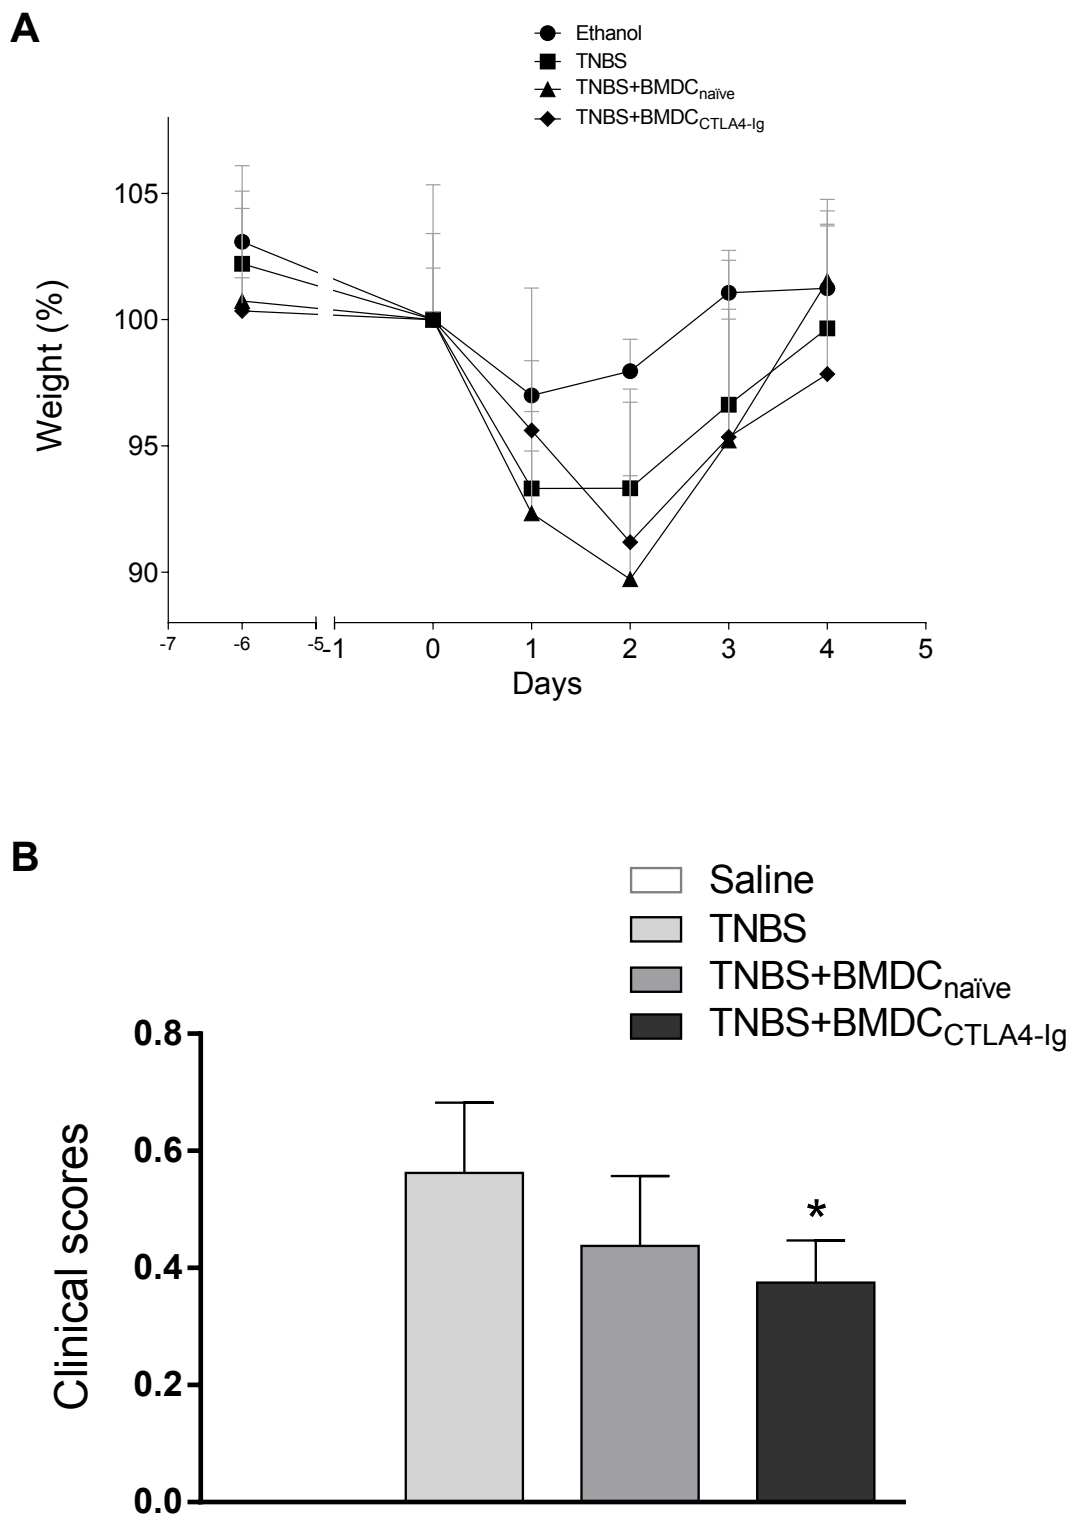

837

839 Figure 3:

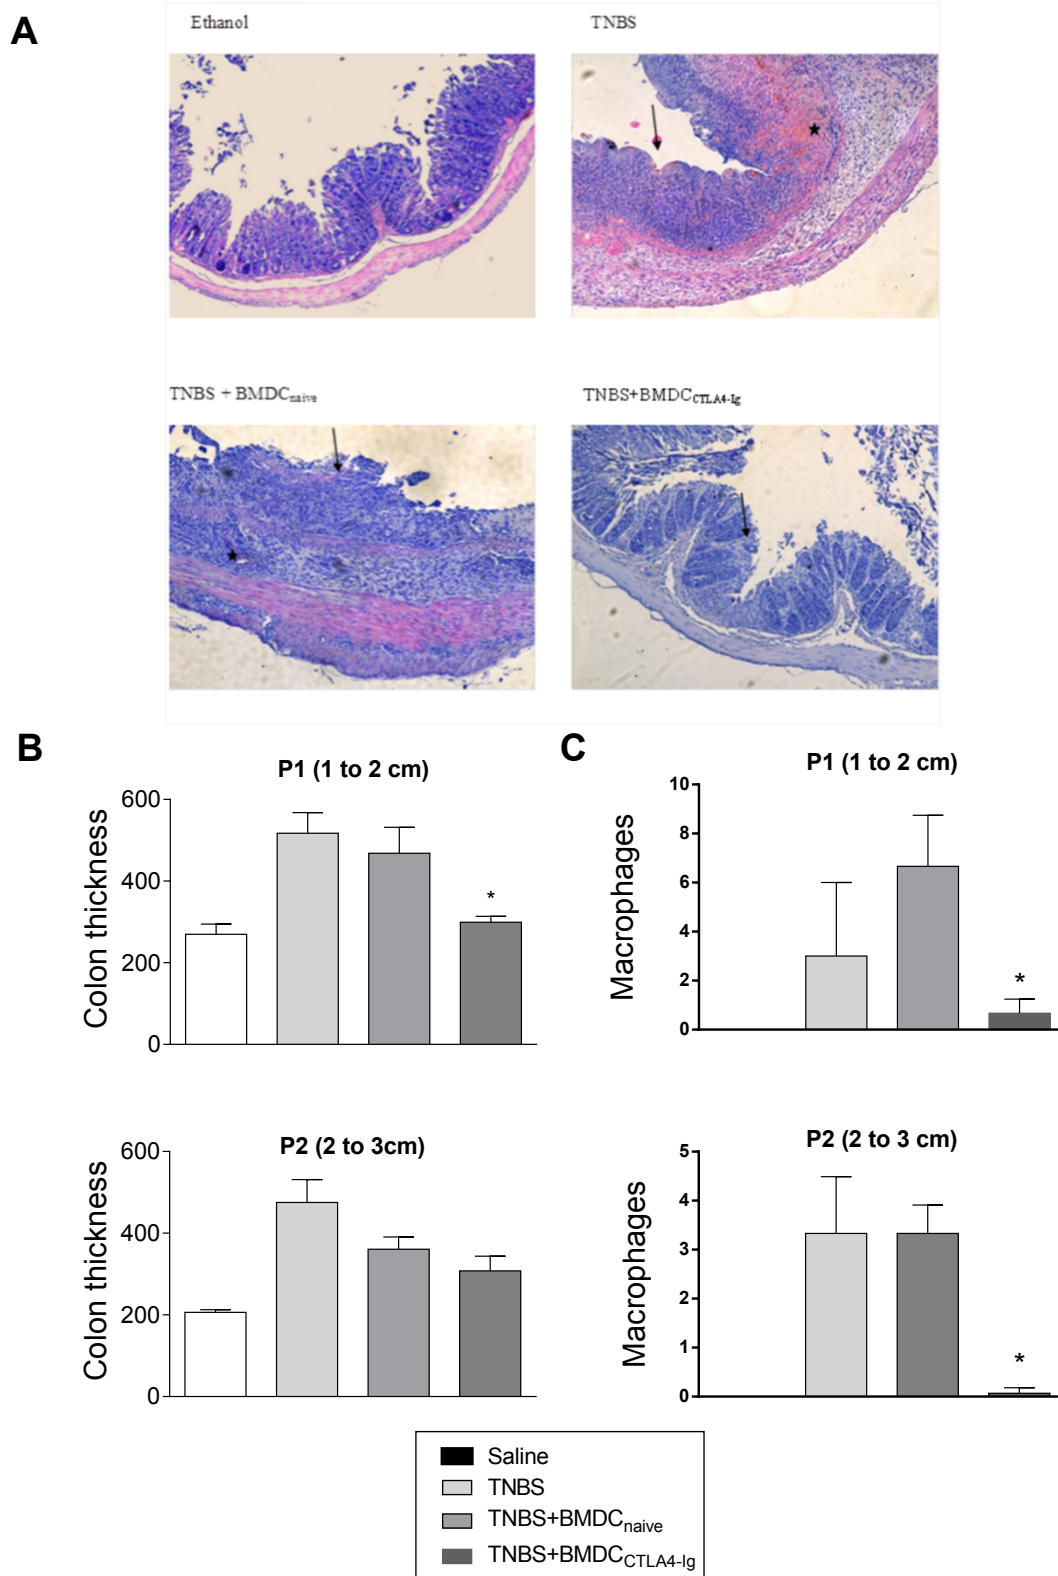

840  
841 Figure 4:

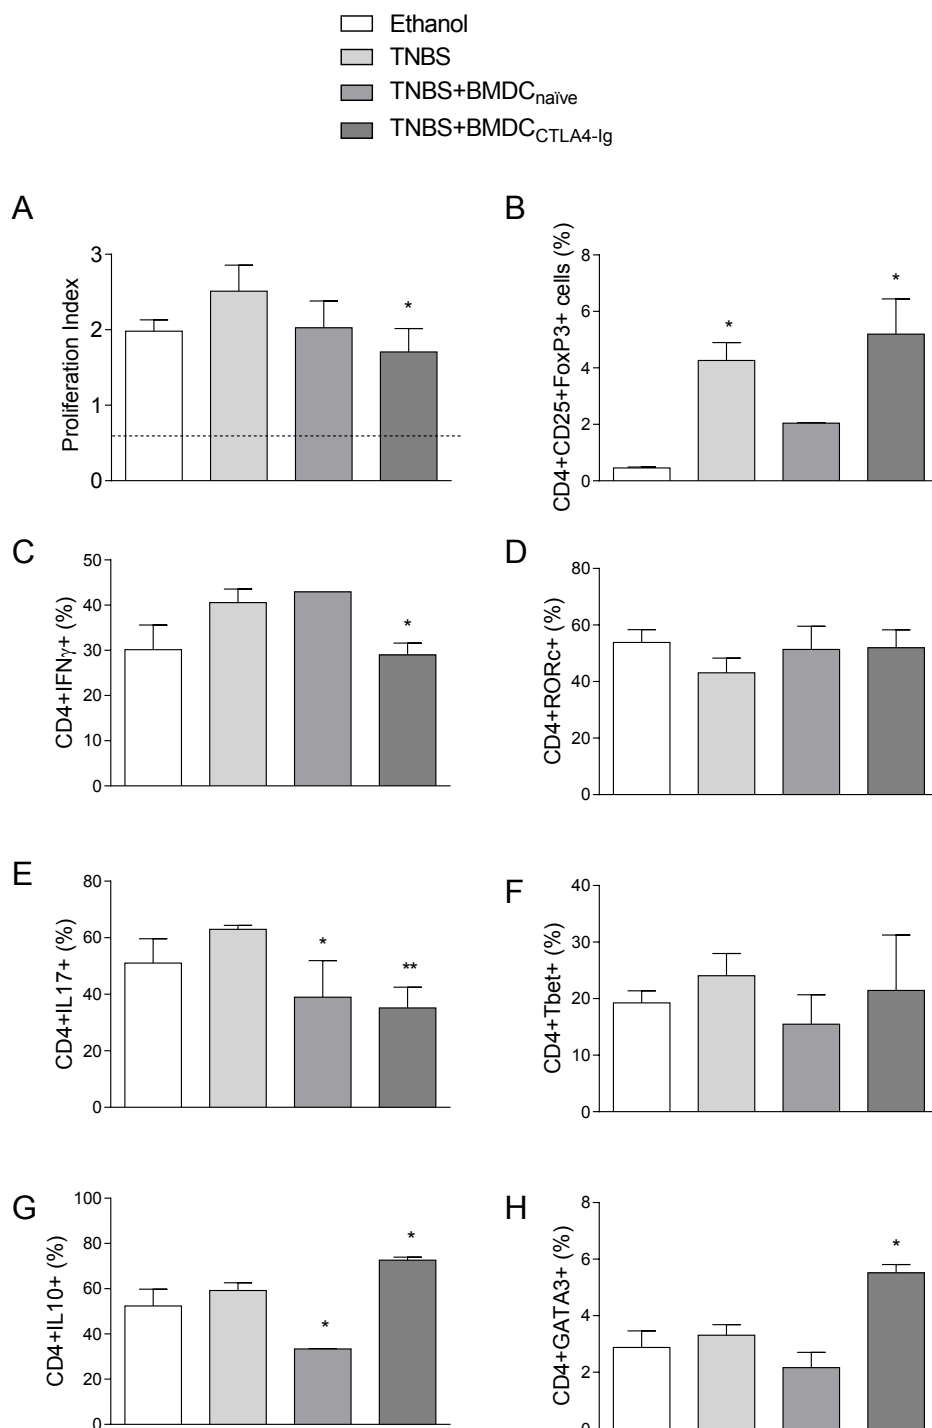

842

843 Figure 5

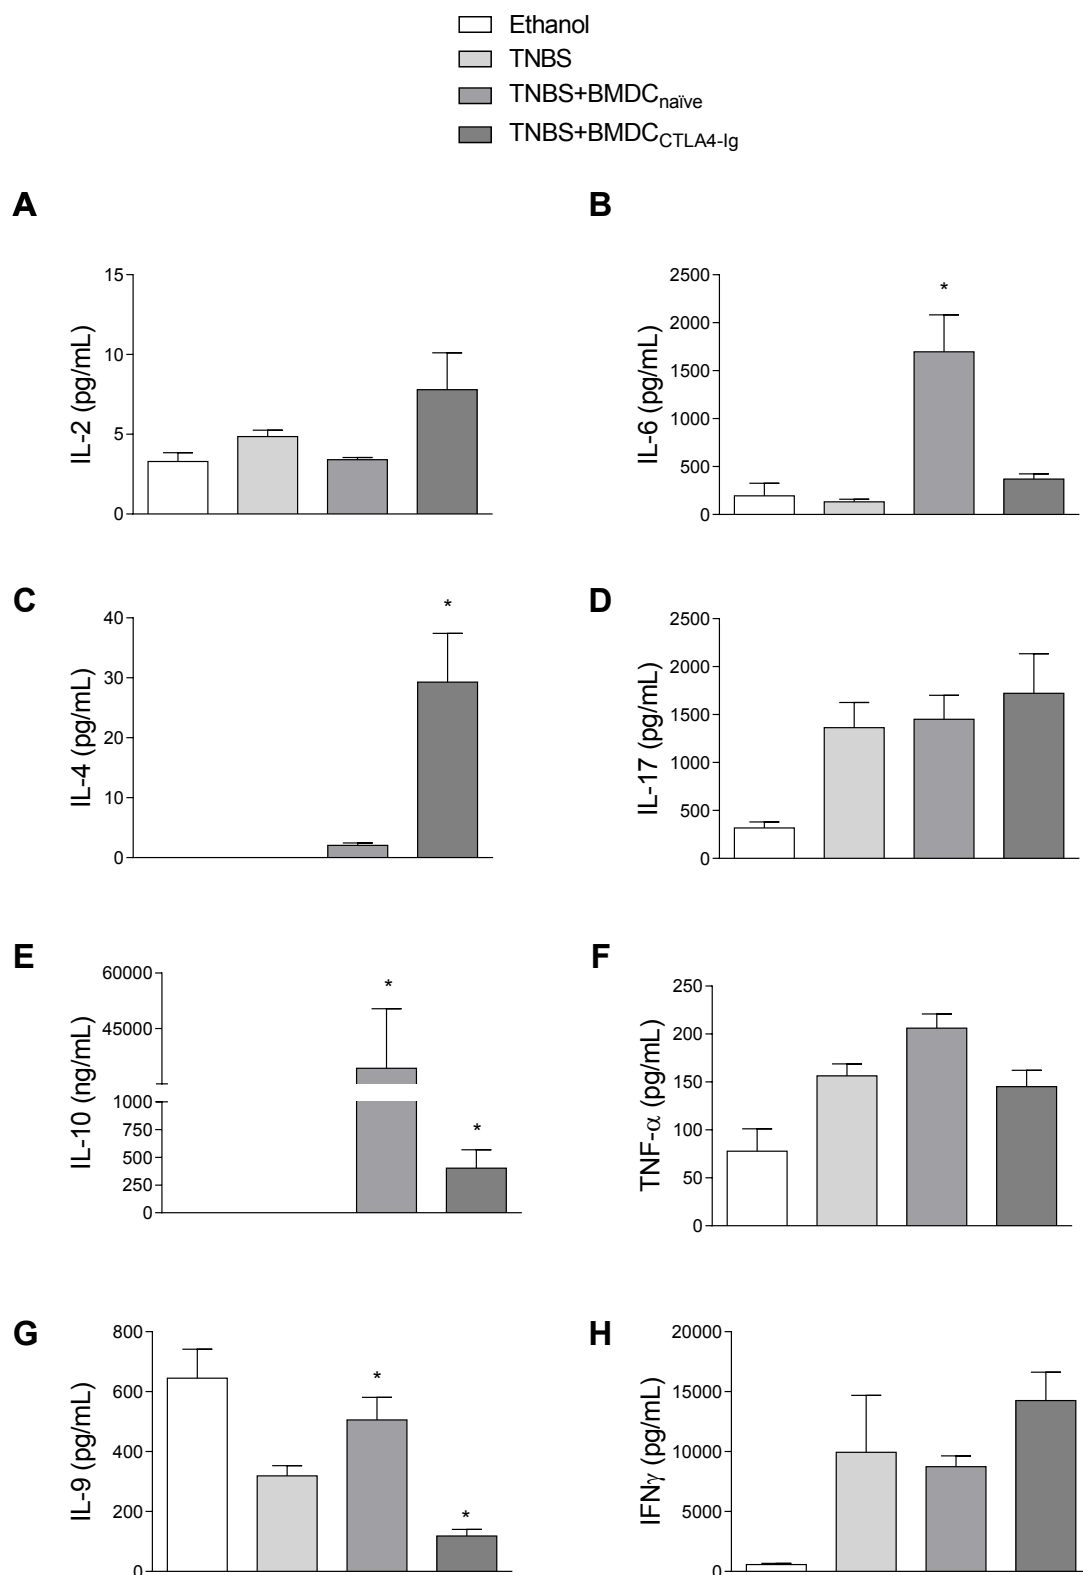

844

845 Supplementary figure 1

44

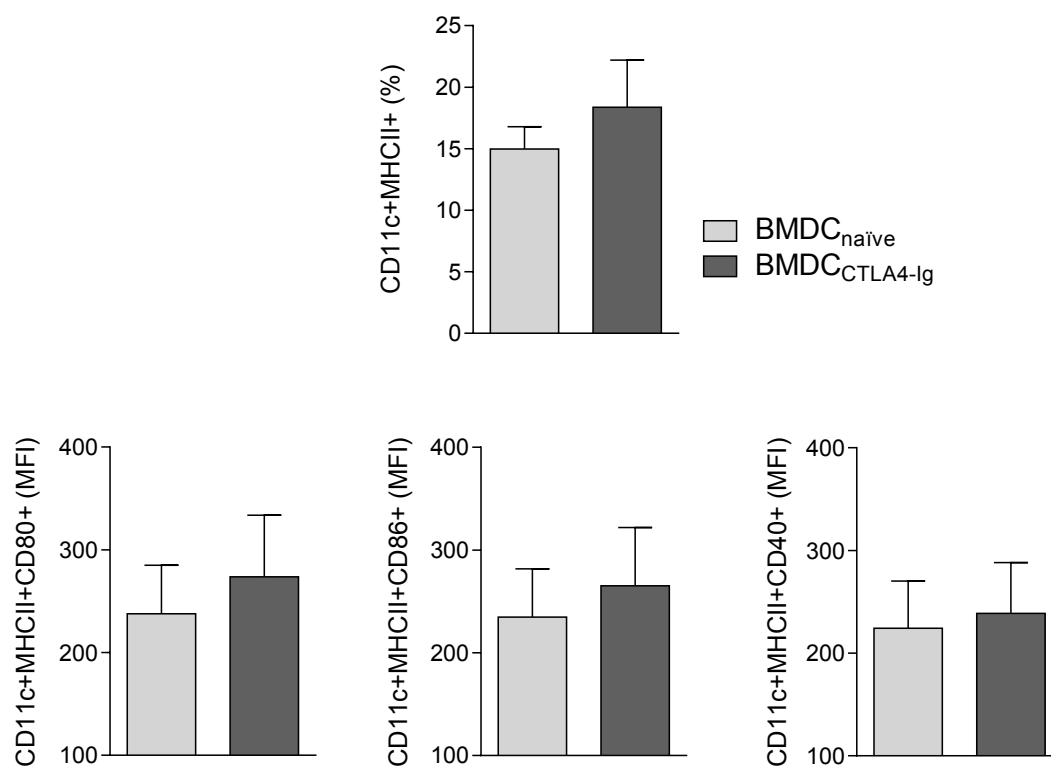

846

847

848
